# Supplementary material for: Tetrahedral nickel(ii) and cobalt(ii) bis-o-iminobenzosemiquinonates
Source: Royal Society of Chemistry journal article supplement (doi:10.1039/c9dt01424a), 2019-01-01
Supplement: c9dt01424a1.pdf [file c9dt01424a1.pdf]

## TETRAHEDRAL NICKEL(II) AND COBALT(II) BIS-O- IMINOBENZOSEMIQUINONATES

Irina V. Ershova, Ivan V. Smolyaninov, Artem S. Bogomyakov, Matvey V. Fedin, Andrey G. Starikov, Anton V. Cherkasov, Georgy K. Fukin, and Alexandr V. Piskunov\*

### Table of contents

|                                                                                                                                                                                                                                                                                          |           |
|------------------------------------------------------------------------------------------------------------------------------------------------------------------------------------------------------------------------------------------------------------------------------------------|-----------|
| <b>Table S1.</b> Coordination geometry and electronic structure of four coordinate nickel and cobalt bis-ligand complexes with different redox active ligands                                                                                                                            | <b>2</b>  |
| <b>Table S2.</b> Crystallographic data and structure refinement details for <b>1</b> and <b>2</b>                                                                                                                                                                                        | <b>3</b>  |
| <b>Figure S1.</b> Molecular structure and fragment of crystal packing of <b>2</b>                                                                                                                                                                                                        | <b>4</b>  |
| <b>Figure S2.</b> Temperature-dependent EPR spectra of <b>2</b> at X-band (left) and Q-band (right) ( $\nu_{mw} \approx 9.75$ and 33.33 GHz, respectively). All spectra are normalized, the values of temperature are indicated                                                          | <b>5</b>  |
| <b>Figure S3.</b> Temperature-dependent EPR spectra of <b>2</b> at X-band (top) and Q-band (bottom) ( $\nu_{mw} \approx 9.75$ and 33.33 GHz, respectively). All spectra are normalized, the values of temperature are indicated in the legend                                            | <b>6</b>  |
| <b>Table S3.</b> Spin state ( $S$ ), total energies ( $E_{total}$ ), expectation values of the spin-squared operator ( $S^2$ ) and exchange spin coupling parameters ( $J$ ) in the electromers of the complexes <b>1</b> and <b>2</b> calculated by the DFT UB3LYP/6-311++G(d,p) method | <b>7</b>  |
| <b>Figure S4.</b> Optimized geometries of complex <b>1</b> and model complexes with <i>N-iso</i> -propyl substituents, calculated by the DFT UB3LYP/6-31G(d,p) method. Hydrogen atoms are omitted for clarity. The bond lengths are given in angstroms (Å)                               | <b>8</b>  |
| <b>Table S4.</b> The $\tau_4$ , $\tau_4'$ parameters of four coordinate nickel and cobalt bis-ligand complexes with different redox active ligands                                                                                                                                       | <b>9</b>  |
| <b>References</b>                                                                                                                                                                                                                                                                        | <b>13</b> |

**Table S1.** Coordination geometry and electronic structure of four coordinate nickel and cobalt bis-ligand complexes with different redox active ligands

| Ligand type                                                                                                                                                                                                                                                  | Coordination geometry                                                                                                                                                                                | Electronic structure                                                                                                                                                                                                  | Ref.                                |
|--------------------------------------------------------------------------------------------------------------------------------------------------------------------------------------------------------------------------------------------------------------|------------------------------------------------------------------------------------------------------------------------------------------------------------------------------------------------------|-----------------------------------------------------------------------------------------------------------------------------------------------------------------------------------------------------------------------|-------------------------------------|
| 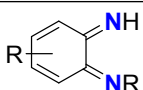 <p><i>o</i>-diiminobenzoquinone</p>                                                                                                                                        |  <p>(disq)<sub>2</sub>M<br/>Square planar</p>                                                                       | <p>M = Ni<sup>II</sup> (l.s.)<br/>↑ ↓<br/>disq-Ni-disq (S<sub>t</sub> = 0)</p> <p>M = Co<sup>II</sup> (l.s.) vs Co<sup>III</sup> (i.s.)<br/>↑ ↑ ↓ ↓<br/>disq-Co-disq      disq-Co-IP<br/>(S<sub>t</sub> = 1/2)</p>    | 1-4<br><br>1, 5, 6                  |
|  <p>1      2      3      4</p> <p>1 <i>o</i>-diiminobenzoquinone<br/>2 1,4-diaza-1,3-butadiene<br/>3 bis(arylimino)acenaphthene<br/>4 <math>\alpha</math>-iminopyridine</p> |  <p>(L<sup>-</sup>)<sub>2</sub>M<br/>(L = disq, DAD, BIAN, IP)<br/>From ideal to strongly distorted tetrahedron</p> | <p>M = Ni<sup>II</sup> (h.s.)<br/>↓ ↑ ↑ ↓<br/>L<sup>-</sup> - Ni - L<sup>-</sup> (S<sub>t</sub> = 0)</p> <p>M = Co<sup>II</sup> (h.s.)<br/>↓ ↑ ↑ ↑ ↓<br/>L<sup>-</sup> - Co - L<sup>-</sup> (S<sub>t</sub> = 1/2)</p> | 7-20<br><br>7, 8, 10,<br>11, 20, 21 |
|  <p><i>o</i>-benzoquinone</p>                                                                                                                                               |  <p>(SQ)<sub>2</sub>M<br/>Square planar</p>                                                                         | <p>M = Ni<sup>II</sup> (l.s.)<br/>↑ ↓<br/>SQ-Ni-SQ (S<sub>t</sub> = 0)</p>                                                                                                                                            | 22, 23                              |
|  <p><i>N</i>-Ar-<i>o</i>-iminobenzoquinone</p>                                                                                                                            |  <p>(imSQ)<sub>2</sub>M<br/>Square planar</p>                                                                     | <p>M = Ni<sup>II</sup> (l.s.)<br/>↑ ↓<br/>imSQ-Ni-imSQ (S<sub>t</sub> = 0)</p> <p>M = Co<sup>II</sup> (l.s.) vs Co<sup>III</sup> (i.s.)<br/>↑ ↑ ↓ ↓<br/>imSQ-Co-imSQ      imSQ-Co-AP<br/>(S<sub>t</sub> = 1/2)</p>    | 6, 24-29<br><br>30-33               |
|  <p><i>N</i>-<i>t</i>-Bu-<i>o</i>-iminobenzoquinone</p>                                                                                                                   |  <p>(imSQ)<sub>2</sub>M<br/>Distorted tetrahedron</p>                                                             | <p>M = Ni<sup>II</sup> (h.s.)<br/>↓ ↑ ↑ ↓<br/>imSQ-Ni-imSQ (S<sub>t</sub> = 0)</p> <p>M = Co<sup>II</sup> (h.s.)<br/>↓ ↑ ↑ ↑ ↓<br/>imSQ-Co-imSQ (S<sub>t</sub> = 1/2)</p>                                             | This work                           |

**Table S2.** Crystallographic data and structure refinement details for **1** and **2**

| Compound                                                     | <b>1</b>                                                          | <b>2</b>                                                          |
|--------------------------------------------------------------|-------------------------------------------------------------------|-------------------------------------------------------------------|
| Empirical formula                                            | C <sub>36</sub> H <sub>58</sub> NiN <sub>2</sub> O <sub>2</sub>   | C <sub>36</sub> H <sub>58</sub> CoN <sub>2</sub> O <sub>2</sub>   |
| Formula weight                                               | 609.55                                                            | 609.77                                                            |
| Crystal system                                               | Triclinic                                                         | Triclinic                                                         |
| Space group                                                  | <i>P</i> -1                                                       | <i>P</i> -1                                                       |
| Unit cell dimensions                                         |                                                                   |                                                                   |
| <i>a</i> [Å]                                                 | 10.7752(6)                                                        | 10.806(3)                                                         |
| <i>b</i> [Å]                                                 | 11.5077(6)                                                        | 11.558(3)                                                         |
| <i>c</i> [Å]                                                 | 15.6525(13)                                                       | 15.589(3)                                                         |
| $\alpha$ [°]                                                 | 79.537(6)                                                         | 79.570(4)                                                         |
| $\beta$ [°]                                                  | 76.217(7)                                                         | 76.133(5)                                                         |
| $\gamma$ [°]                                                 | 72.440(5)                                                         | 72.544(5)                                                         |
| <i>V</i> [Å <sup>3</sup> ]                                   | 1784.5(2)                                                         | 1790.5(7)                                                         |
| <i>Z</i>                                                     | 2                                                                 | 2                                                                 |
| <i>d</i> <sub>calc</sub> [g cm <sup>-3</sup> ]               | 1.134                                                             | 1.131                                                             |
| $\mu$ [mm <sup>-1</sup> ]                                    | 0.574                                                             | 0.510                                                             |
| <i>F</i> <sub>000</sub>                                      | 664                                                               | 662                                                               |
| Crystaldimensions [mm <sup>3</sup> ]                         | 0.43 × 0.25 × 0.08                                                | 0.80 × 0.80 × 0.05                                                |
| $\theta$ range for data collection [°]                       | 3.10–28.70                                                        | 2.43–27.10                                                        |
| Reflections collected                                        | 11315                                                             | 19410                                                             |
| Independent reflections ( <i>R</i> <sub>int</sub> )          | 11315( <i>R</i> <sub>int</sub> = 0.1003)                          | 7834( <i>R</i> <sub>int</sub> = 0.0757)                           |
| Completeness to $\theta$ [%]                                 | 99.8                                                              | 99.5                                                              |
| Data/restraints/parameters                                   | 11315 / 0 / 389                                                   | 7834 / 0 / 388                                                    |
| Final <i>R</i> indices [ <i>I</i> > 2 $\sigma$ ( <i>I</i> )] | <i>R</i> <sub>1</sub> = 0.0741<br><i>wR</i> <sub>2</sub> = 0.1450 | <i>R</i> <sub>1</sub> = 0.0578<br><i>wR</i> <sub>2</sub> = 0.1278 |
| Final <i>R</i> indices (all data)                            | <i>R</i> <sub>1</sub> = 0.1080<br><i>wR</i> <sub>2</sub> = 0.1573 | <i>R</i> <sub>1</sub> = 0.0824<br><i>wR</i> <sub>2</sub> = 0.1393 |
| <i>S</i> ( <i>F</i> <sup>2</sup> )                           | 1.031                                                             | 1.014                                                             |
| Largest diff. peak and hole [e Å <sup>-3</sup> ]             | 0.95 / -0.97                                                      | 1.05 / -1.03                                                      |

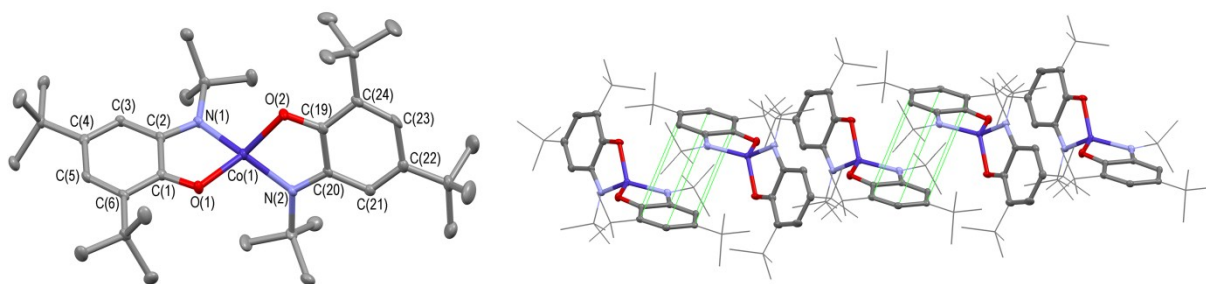

**Figure S1.** Molecular structure (left) and fragment of crystal packing of **2** (right). Thermal ellipsoids are drawn at the 50% probability level. Hydrogen atoms are omitted.

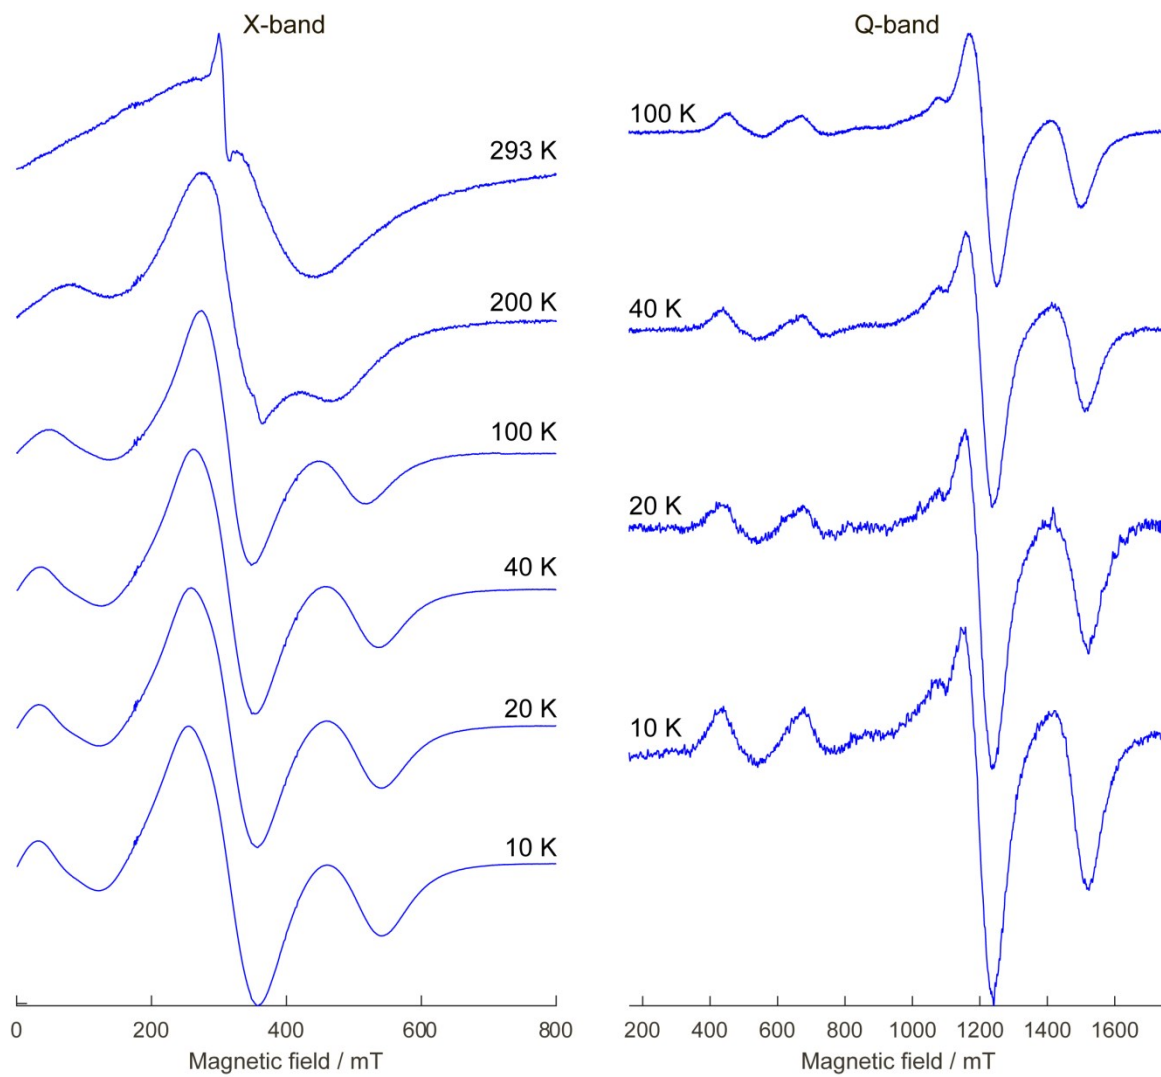

**Figure S2.** Temperature-dependent EPR spectra of 2 at X-band (left) and Q-band (right) ( $\nu_{mw} \approx 9.75$  and 33.33 GHz, respectively). All spectra are normalized, the values of temperature are indicated.

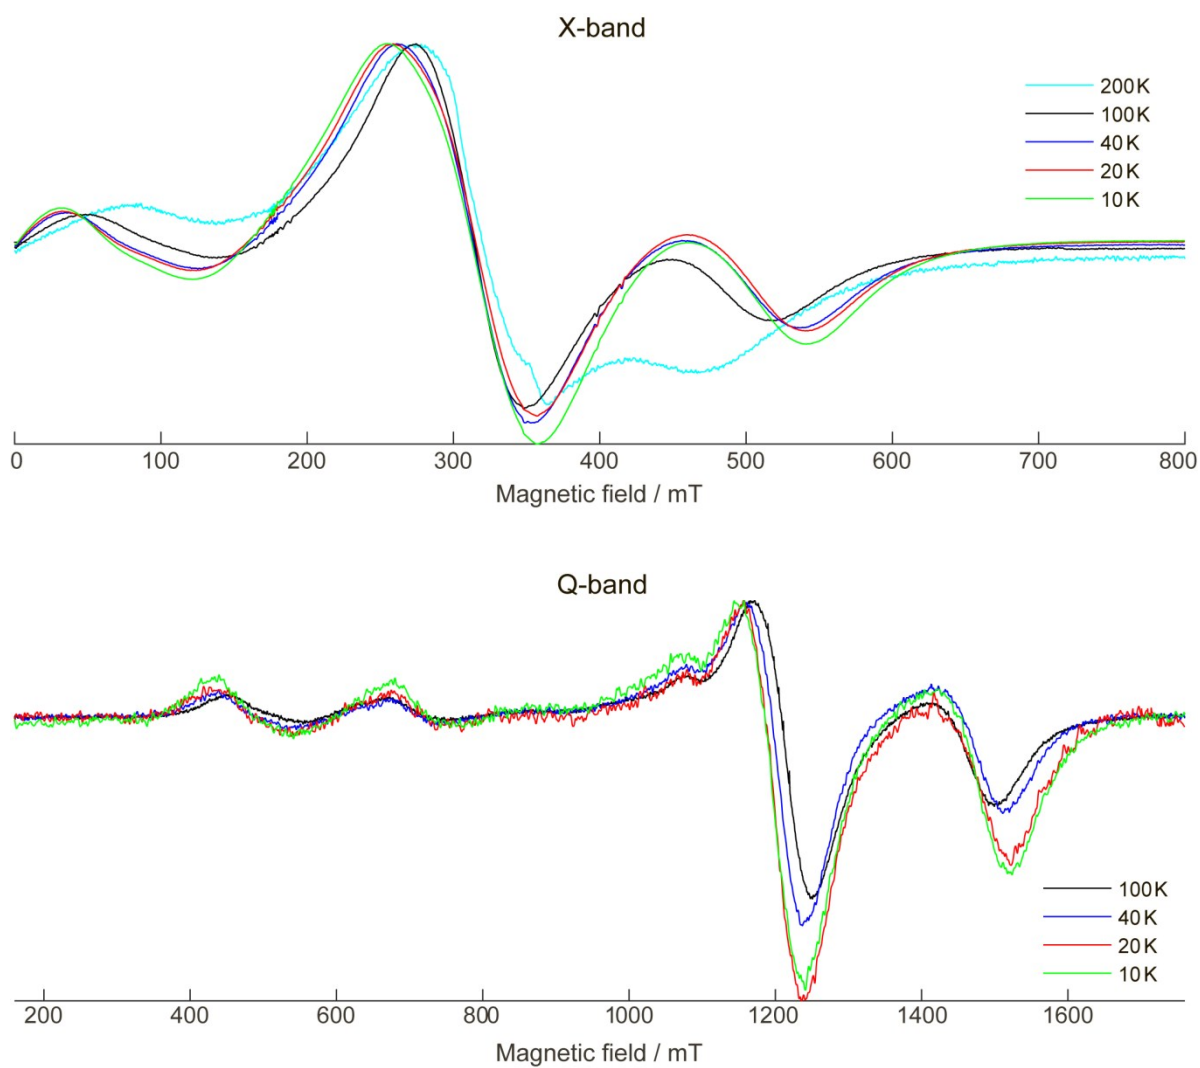

**Figure S3.** Temperature-dependent EPR spectra of **2** at X-band (top) and Q-band (bottom) ( $\nu_{mw} \approx 9.75$  and  $33.33$  GHz, respectively). All spectra are normalized, the values of temperature are indicated in the legend.

**Table S3.** Spin state ( $S$ ), total energies ( $E_{\text{total}}$ ), expectation values of the spin-squared operator ( $S^2$ ) and exchange spin coupling parameters ( $J$ ) in the electromers of the complexes **1** and **2** calculated by the DFT UB3LYP/6-311++G(d,p) method

| Electromer                  | $S$ | $E_{\text{total}}$ , a.u. | $S^2$ | $J_{\text{SQ-SQ}}$ , $\text{cm}^{-1}$ | $J_{\text{M-SQ}}$ , $\text{cm}^{-1}$ |
|-----------------------------|-----|---------------------------|-------|---------------------------------------|--------------------------------------|
| <b>Co(imSQ)<sub>2</sub></b> |     |                           |       |                                       |                                      |
| Single Point                |     |                           |       |                                       |                                      |
| $\alpha\alpha\alpha$        | 5/2 | -3049.422395              | 8.779 | 33                                    | -665                                 |
| $\alpha\alpha\beta$         | 3/2 | -3049.431923              | 4.588 |                                       |                                      |
| $\alpha\beta\alpha$         | 1/2 | -3049.441752              | 2.390 |                                       |                                      |
| Optimization                |     |                           |       |                                       |                                      |
| $\alpha\alpha\alpha$        | 5/2 | -3050.012867              | 8.778 | 40                                    | -484                                 |
| $\alpha\alpha\beta$         | 3/2 | -3050.019638              | 4.633 |                                       |                                      |
| $\alpha\beta\alpha$         | 1/2 | -3050.026772              | 2.473 |                                       |                                      |
| <b>Ni(imSQ)<sub>2</sub></b> |     |                           |       |                                       |                                      |
| Single Point                |     |                           |       |                                       |                                      |
| $\alpha\alpha\alpha$        | 4/2 | -3174.946725              | 6.026 | -64                                   | -1018                                |
| $\alpha\alpha\beta$         | 2/2 | -3174.957366              | 2.793 |                                       |                                      |
| $\alpha\beta\alpha$         | 0   | -3174.967419              | 1.567 |                                       |                                      |
| Optimization                |     |                           |       |                                       |                                      |
| $\alpha\alpha\alpha$        | 4/2 | -3175.546763              | 6.025 | -51                                   | -496                                 |
| $\alpha\alpha\beta$         | 2/2 | -3175.551873              | 2.860 |                                       |                                      |
| $\alpha\beta\alpha$         | 0   | -3175.556512              | 1.711 |                                       |                                      |

\* $\alpha$  corresponds to spin-up,  $\beta$  corresponds to spin-down; the ordering of paramagnetic centers: 1 – SQ, 2 – M, 3 – SQ

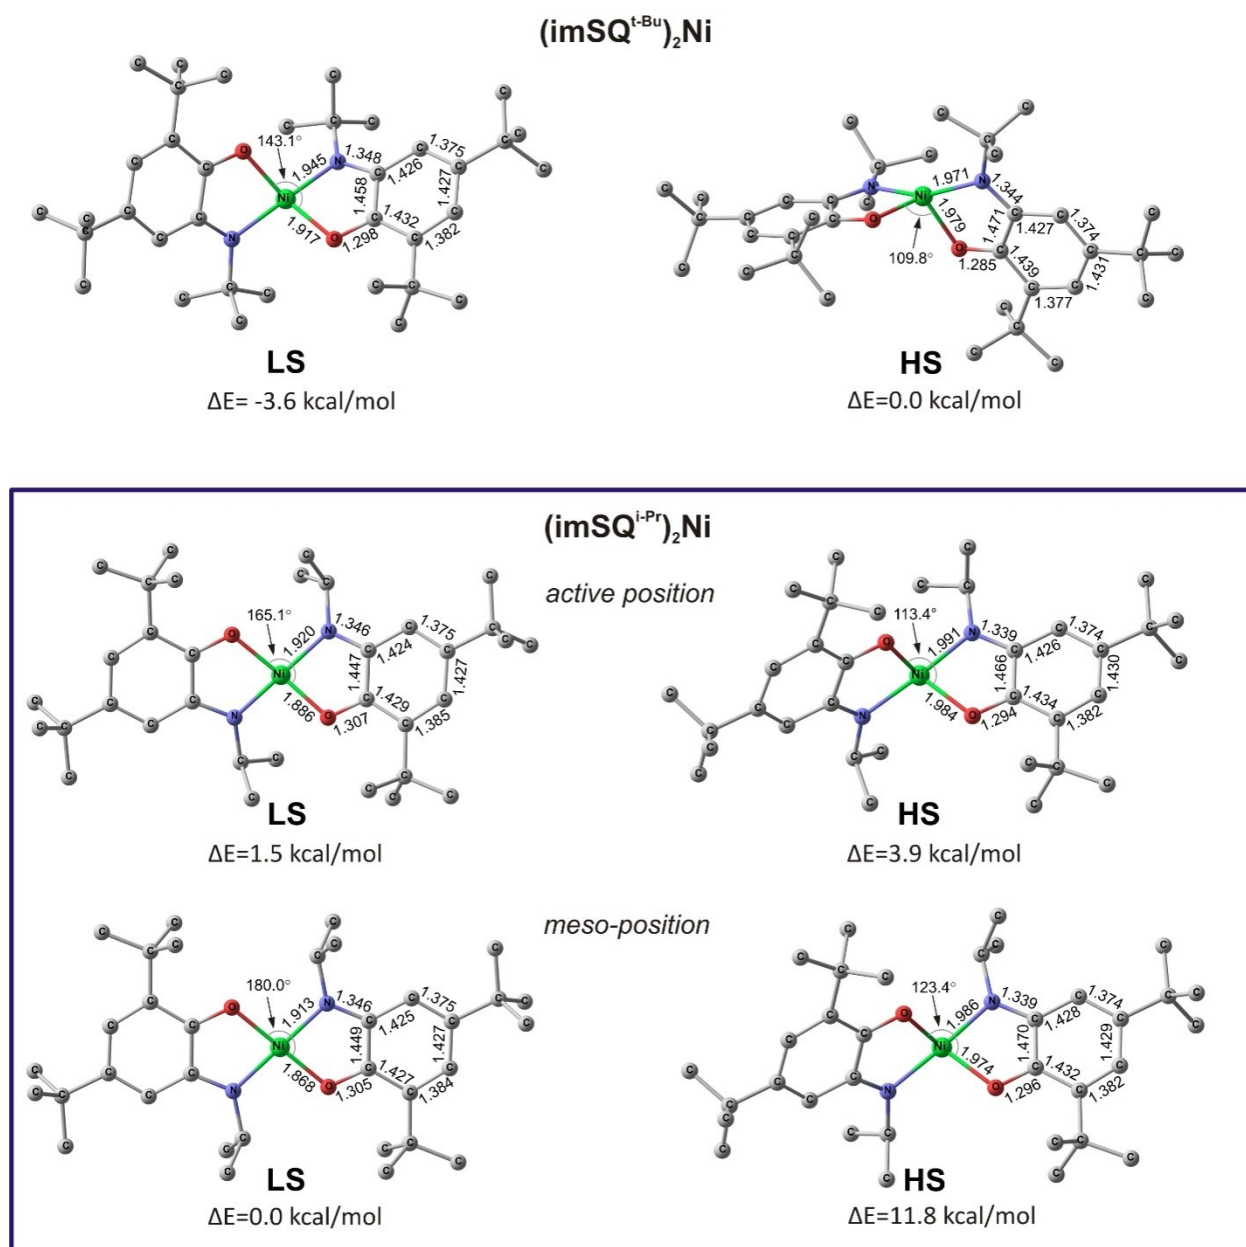

**Figure S4.** Optimized geometries of complex **1** and model complexes with *N*-*iso*-propyl substituents, calculated by the DFT UB3LYP/6-311++G(d,p) method. Hydrogen atoms are omitted for clarity. The bond lengths are given in angstroms (Å).



**Table S4.** The  $\tau_4$ ,  $\tau_4'$  parameters of four coordinate nickel and cobalt bis-ligand complexes with different redox active ligands

| Nickel bis- <i>o</i> -benzosemiquinonates (SQ) <sub>2</sub> Ni |    |    |    |  |
|----------------------------------------------------------------|----|----|----|--|
| SQ =                                                           |    |    |    |  |
| $\tau_4, \tau_4'$                                              | 0  | 0  | 0  |  |
| Ref.                                                           | 22 | 23 | 23 |  |

  

| Nickel bis- <i>o</i> -iminobenzosemiquinonates (imSQ) <sub>2</sub> Ni |            |            |            |            |
|-----------------------------------------------------------------------|------------|------------|------------|------------|
| imSQ =                                                                |            |            |            |            |
| $\tau_4, \tau_4'$                                                     | 0.05; 0.04 | 0          | 0          | 0.04; 0.04 |
| Ref.                                                                  | 26         | 6          | 24         | 27         |
| imSQ =                                                                |            |            |            |            |
| $\tau_4, \tau_4'$                                                     | 0          | 0          | 0          | 0.71; 0.69 |
| Ref.                                                                  | 28         | 28         | 29         | This work  |
|                                                                       |            |            |            |            |
| $\tau_4, \tau_4'$                                                     | 0.30; 0.29 | 0.05; 0.05 | 0.64; 0.61 |            |
| Ref.                                                                  | 34         | 25         | 35         |            |

  

| <i>o</i> -iminobenzoquinonatecobaltcomplexes (imSQ)Co <sup>III</sup> (AP), imSQ <sub>2</sub> Co <sup>II</sup> |    |    |            |            |
|---------------------------------------------------------------------------------------------------------------|----|----|------------|------------|
| imSQ =                                                                                                        |    |    |            |            |
| $\tau_4, \tau_4'$                                                                                             | 0  | 0  | 0.04; 0.03 | 0          |
| Ref.                                                                                                          | 32 | 31 | 30         | 33         |
|                                                                                                               |    |    |            |            |
|                                                                                                               |    |    |            | 0.73; 0.70 |
|                                                                                                               |    |    |            | This work  |

**bis-*o*-diiminobenzosemiquinonatecobaltcomplexes (disq)<sub>2</sub>Co<sup>II</sup>, (disq)Co<sup>III</sup>(IP)**

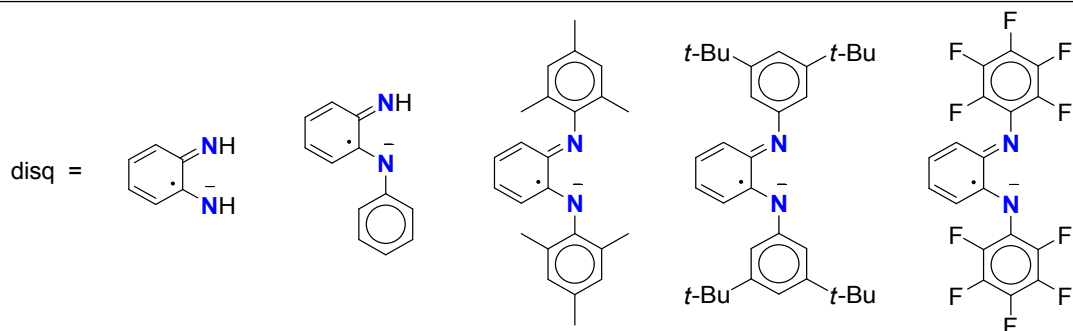

|                   |      |   |             |          |            |
|-------------------|------|---|-------------|----------|------------|
| $\tau_4, \tau_4'$ | 0    | 0 | 0.47; 0.470 | 0.8; 0.8 | 0.48; 0.47 |
| Ref.              | 1, 5 | 6 | 21          | 8        | 7          |

**Nickel bis-*o*-diiminobenzosemiquinonates (disq)<sub>2</sub>Ni**

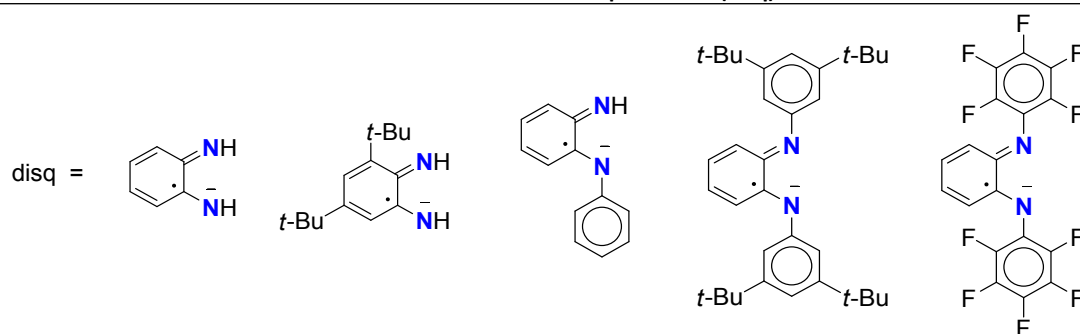

|                   |   |   |     |            |            |
|-------------------|---|---|-----|------------|------------|
| $\tau_4, \tau_4'$ | 0 | 0 | 0   | 0.85; 0.85 | 0.48; 0.46 |
| Ref.              | 1 | 2 | 2-4 | 8          | 7          |

| bis(1,4-diaza-1,3-butadiene)nickel complexes (DAD) <sub>2</sub> Ni |            |            |            |            |            |
|--------------------------------------------------------------------|------------|------------|------------|------------|------------|
| DAD =                                                              |            |            |            |            |            |
| $\tau_4, \tau_4'$                                                  | 0.78; 0.78 | 0.80; 0.79 | 0.67; 0.66 | 0.43; 0.43 | 0.51; 0.51 |
| Ref.                                                               | 13         | 10, 12     | 9          | 14         | 11         |
| DAD =                                                              |            |            |            |            |            |
| $\tau_4, \tau_4'$                                                  | 0.45; 0.45 | 0.47; 0.47 | 0.78; 0.75 | 0.45; 0.45 | 0.49; 0.47 |
| Ref.                                                               | 17         | 18         | 16         | 15         | 15         |

**bis(1,4-diaza-1,3-butadiene)cobalt complexes (DAD)<sub>2</sub>Co**

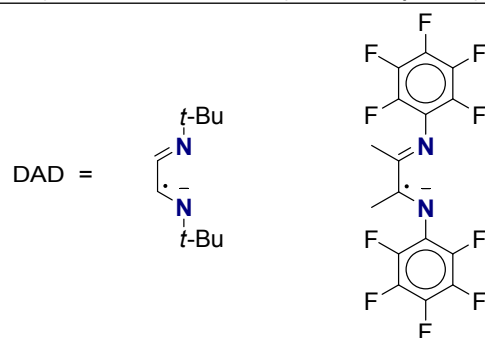

|                   |            |            |
|-------------------|------------|------------|
| $\tau_4, \tau_4'$ | 0.81; 0.81 | 0.53; 0.53 |
| Ref.              | 10         | 11         |

**bis(arylimino)acenaphthene nickel complexes (BIAN)<sub>2</sub>Ni**

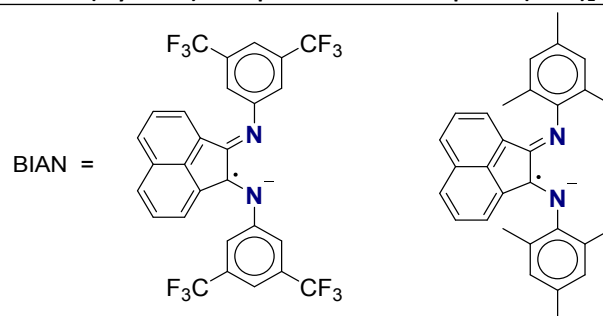

|                   |            |            |
|-------------------|------------|------------|
| $\tau_4, \tau_4'$ | 0.80; 0.80 | 0.44; 0.44 |
| Ref.              | 11         | 7          |

**Bis( $\alpha$ -iminopyridine)metal complexes (IP)<sub>2</sub>M**

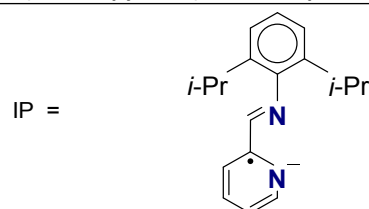

|                   |                      |                      |
|-------------------|----------------------|----------------------|
| $\tau_4, \tau_4'$ | M = Ni<br>0.67; 0.66 | M = Co<br>0.71; 0.71 |
| Ref.              | 20                   | 20                   |

## References

1. A. L. Balch and R. H. Holm, *J. Am. Chem. Soc.*, 1966, **88**, 5201-5209.
2. D. Herebian, E. Bothe, F. Neese, T. Weyhermüller and K. Wieghardt, *J. Am. Chem. Soc.*, 2003, **125**, 9116-9128.
3. H.-Y. Cheng, C.-C. Lin, B.-C. Tzeng and S.-M. Peng, *Journal of the Chinese Chemical Society*, 1994, **41**, 775-781.
4. A. A. Sidorov, P. V. Danilov, S. E. Nefedov, M. A. Golubnichaya, I. G. Fomina, O. G. Ellert, V. M. Novotortsev and I. L. Eremenko, *Russ. J. Inorg. Chem.*, 1998, **43**, 846.
5. S.-M. Peng, C.-T. Chen, D.-S. Liaw, C.-I. Chen and Y. Wang, *Inorg. Chim. Acta*, 1985, **101**, L31-L33.
6. E. Bill, E. Bothe, P. Chaudhuri, K. Chlopek, D. Herebian, S. Kokatam, K. Ray, T. Weyhermüller, F. Neese and K. Wieghardt, *Chem. Eur. J.*, 2005, **11**, 204-224.
7. M. M. Khusniyarov, K. Harms, O. Burghaus, J. Sundermeyer, B. Sarkar, W. Kaim, J. v. Slageren, C. Duboc and J. Fiedler, *Dalton Trans.*, 2008, DOI: 10.1039/b714974c, 1355-1365.
8. K. Chłopek, E. Bothe, F. Neese, T. Weyhermüller and K. Wieghardt, *Inorg. Chem.*, 2006, **45**, 6298-6307.
9. T. M. Porter, G. B. Hall, T. L. Groy and R. J. Trovitch, *Dalton Trans.*, 2013, **42**, 14689-14692.
10. T. J. Knisley, M. J. Saly, M. J. Heeg, J. L. Roberts and C. H. Winter, *Organometallics*, 2011, **30**, 5010-5017.
11. M. M. Khusniyarov, K. Harms, O. Burghaus and J. Sundermeyer, *Eur. J. Inorg. Chem.*, 2006, DOI: 10.1002/ejic.200600236, 2985-2996.
12. H. Gorls, D. Walther and J. Sieler, *Cryst. Res. Technol.*, 1987, **22**, 1145-1151.
13. M. Svoboda and H. t. Dieck, *Z. Naturforschung*, 1981, **36b**, 814-822.
14. H. t. Dieck, M. Svoboda and T. Greiser, *Z. Naturforschung*, 1981, **36b**, 823-832.
15. N. Muresan, T. Weyhermüller and K. Wieghardt, *Dalton Trans.*, 2007, DOI: 10.1039/b709390j, 4390-4398.
16. N. Muresan, K. Chlopek, T. Weyhermüller, F. Neese and K. Wieghardt, *Inorg. Chem.*, 2007, **46**, 5327-5337.
17. T. Schaub and U. Radius, *Z. Anorg. Allg. Chem.*, 2006, **632**, 807-813.
18. W. Bonrath, K. R. Pörschke, R. Mynott and C. Krüger, *Z. Naturforschung*, 1990, **45b**, 1647-1650.
19. M. J. Sgro and D. W. Stephan, *Dalton Trans.*, 2010, **39**, 5786-5794.
20. C. C. Lu, E. Bill, T. Weyhermüller, E. Bothe and K. Wieghardt, *J. Am. Chem. Soc.*, 2008, **130**, 3181-3197.
21. M. van der Meer, Y. Rechkemmer, I. Peremykin, S. Hohloch, J. v. Slageren and B. Sarkar, *Chem. Comm.*, 2014, **50**, 11104-11106.
22. G. A. Abakumov, V. K. Cherkasov, M. P. Bubnov, O. G. Ellert, Y. V. Rakitin, L. N. Zakharov, Y. T. Struchkov and Y. N. Saf'yanov, *Russ. Chem. Bull.*, 1992, 1813-1818.
23. M. P. Bubnov, N. A. Skorodumova, E. V. Baranov, A. S. Bogomyakov, V. K. Cherkasov and G. A. Abakumov, *Inorg. Chim. Acta*, 2013, **406**, 153-159.
24. P. Chaudhuri, C. N. Verani, E. Bill, E. Bothe, T. Weyhermüller and K. Wieghardt, *J. Am. Chem. Soc.*, 2001, **123**, 2213-2223.
25. K. S. Min, T. Weyhermüller, E. Bothe and K. Wieghardt, *Inorg. Chem.*, 2004, **43**, 2922-2931.
26. A. Mukherjee and R. Mukherjee, *Indian Journal of Chemistry*, 2011, **50A**, 484-490.
27. A. Paretzki, M. Bubrin, J. Fiedler, S. Zalis and W. Kaim, *Chem. Eur. J.*, 2014, **20**, 5414-5422.
28. A. V. Piskunov, I. V. Ershova, M. V. Gulenova, K. I. Pashanova, A. S. Bogomyakov, I. V. Smolyaninov, G. K. Fukin and V. K. Cherkasov, *Russ. Chem. Bull.*, 2015, **64**, 642-649.
29. D. L. J. Broere, D. K. Modder, E. Blokker, M. A. Siegler and J. I. van der Vlugt, *Angew. Chem. Int. Ed.*, 2016, **55**, 2406-2410.
30. A. I. Poddel'sky, V. K. Cherkasov, G. K. Fukin, M. P. Bubnov, L. G. Abakumova and G. A. Abakumov, *Inorg. Chim. Acta*, 2004, **357**, 3632-3640.
31. E. Bill, E. Bothe, P. Chaudhuri, K. Chlopek, D. Herebian, S. Kokatam, K. Ray, T. Weyhermüller, F. Neese and K. Wieghardt, *Chem. Eur. J.*, 2005, **11**, 204-224.
32. A. L. Smith, L. A. Clapp, K. I. Hardcastle and J. D. Soper, *Polyhedron*, 2010, **29**, 164-169.

33. A. V. Piskunov, K. I. Pashanova, A. S. Bogomyakov, I. V. Smolyaninov, A. G. Starikov and G. K. Fukin, *Dalton Trans.*, 2018, **47**, 15049-15060.
34. C. Mukherjee, T. Weyhermüller, E. Bothe and P. Chaudhuri, *Inorg. Chem.*, 2008, **47**, 11620-11632.
35. A. M. Whalen, S. Bhattacharya and C. G. Pierpont, *Inorg. Chem.*, 1994, **33**, 347-353.
